# Supplementary material
Source: ML conference proceedings conference paper supplement (https://proceedings.neurips.cc/paper_files/paper/2014/hash/e53a0a2978c28872a4505bdb51db06dc-Abstract.html)
Supplement: Supplementary file [file e53a0a2978c28872a4505bdb51db06dc-Supplemental.zip]

## Supplemental Material

### Illustrations of the Forcing Operations.

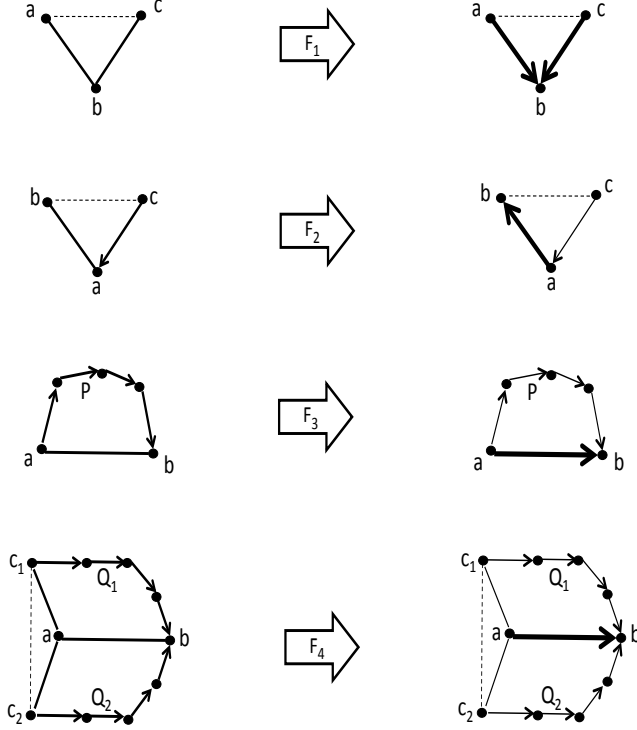

Figure 2: Forced Orientations.

#### Proof of Theorem 4.1.

Without loss of generality, we may assume the vertex ordering is  $\{1, 2, \dots, n\}$ . Given this ordering, we want to know what is the probability that vertex  $t$  is the  $r$ th (smallest) vertex in an undirected clique in  $\mathcal{U}$ . Observe that there are  $\binom{t-1}{r-1}$  possible  $r$ -cliques ending at vertex  $t$ . Take any such clique  $Q$ . Let  $A_Q$  be the indicator variable for  $Q$  to be a clique in  $\mathcal{U}$ .

To calculate the probability of this event, first note that each edge  $e = (j, i)$ ,  $j < i \leq t$  in  $Q$  must have been selected in the random graph  $C_{n,p}$ . This occurs with probability  $p^{\binom{r}{2}}$ . Furthermore, no edge  $(j, t) \in Q$  can be contained in any  $v$ -structure; otherwise its orientation will already have been discovered and it will not be in  $\mathcal{U}$ . For these events to occur,  $(j, t)$  must be chosen as an edge in the random graph **and** for all  $k < t$ ,  $k \notin Q$ , either  $(k, t)$  is not an edge or  $(k, t)$  is an edge and  $(k, q)$  is an edge for all  $q \in Q$ ,  $q < t$ . Thus, if  $t$  is the  $r$ th smallest vertex in  $Q$ ,

$$P(A_Q) \leq p^{\binom{r}{2}} \cdot ((1-p) + p \cdot p^{r-1})^{t-r}$$

Therefore, by the union bound, the probability that any  $r$ -clique ends at vertex  $t$  is at most

$$\binom{t-1}{r-1} \cdot p^{\binom{r}{2}} \cdot (1-p+p^r)^{t-r} \leq \binom{t}{r} \cdot p^{\binom{r}{2}} \cdot (1-p+p^r)^{t-r}$$
